# Supplementary material for: Association of Obesity With Survival Outcomes in Patients With Cancer: A Systematic Review and Meta-analysis
Source: PubMed Central journal article supplement (PMC8008284; doi:10.1001/jamanetworkopen.2021.3520), 2021-03-29

## Supplemental Online Content

Petrelli F, Cortellini A, Indini A, et al. Association of obesity with survival outcomes in patients with cancer: a systematic review and meta-analysis. *JAMA Netw Open*. 2021;4(3):e213520. doi:10.1001/jamanetworkopen.2021.3520

**eFigure 1.** Forest Plot for Overall Survival

**eFigure 2.** Forest Plot for Cancer-Specific Survival

**eFigure 3.** Forest Plot for Disease-Free Survival

**eFigure 4.** Funnel Plot for Overall Survival Analysis

This supplemental material has been provided by the authors to give readers additional information about their work.

eFigure 1. Forest Plot for Overall Survival

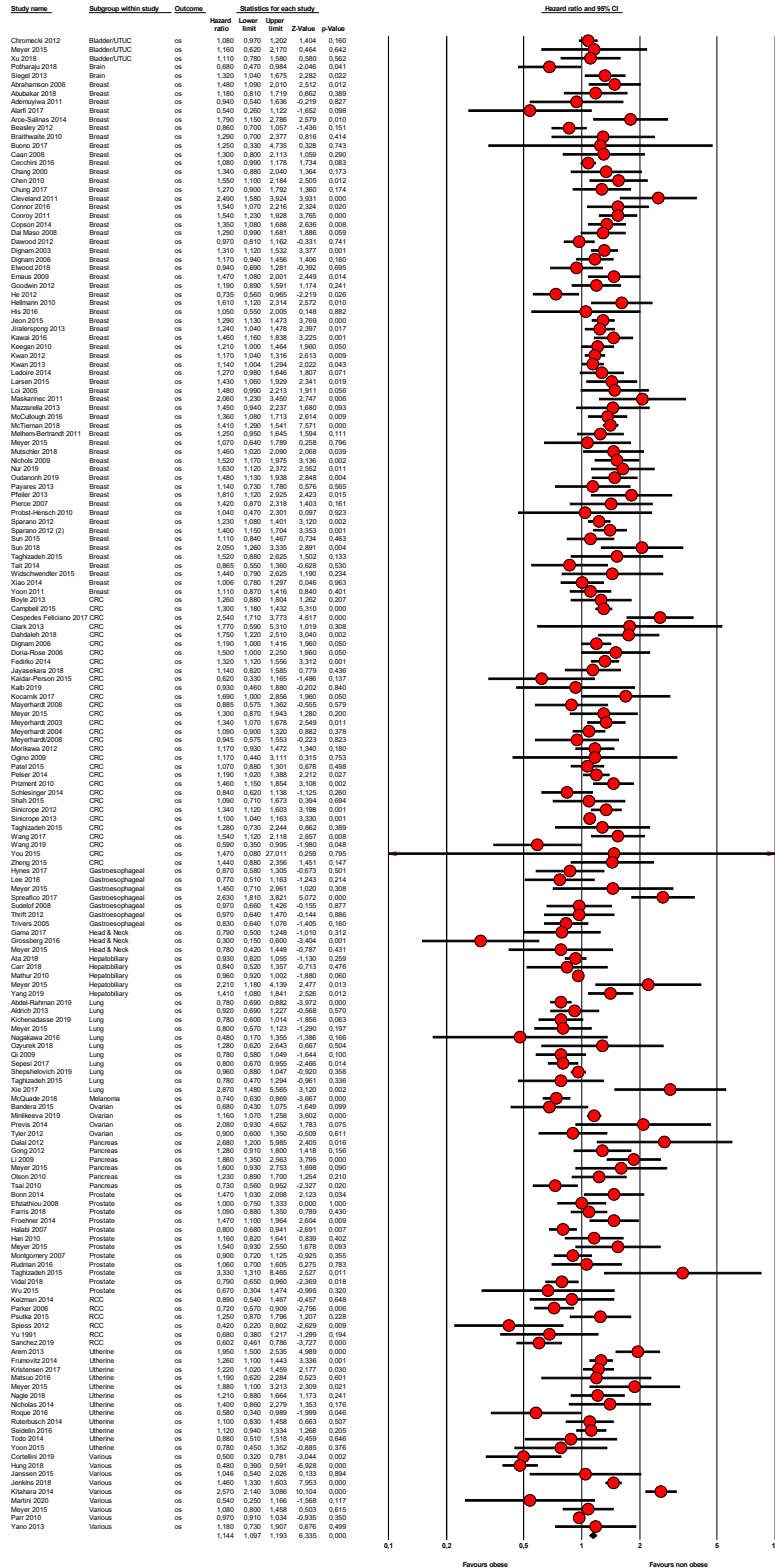

eFigure 2. Forest Plot for Cancer-Specific Survival

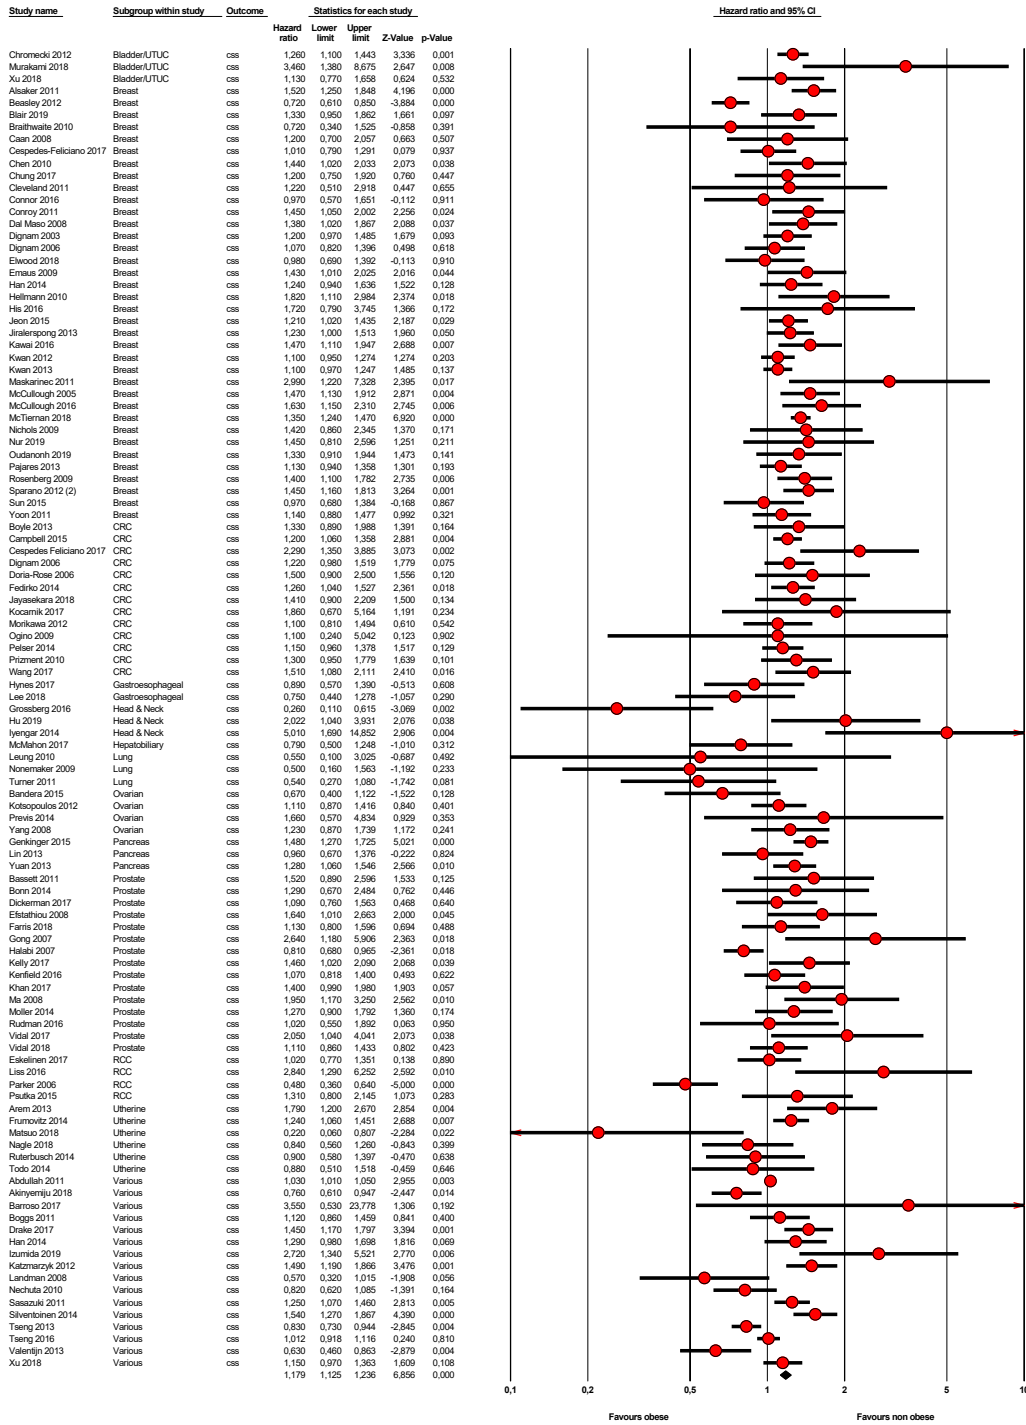

eFigure 3. Forest Plot for Disease-Free Survival

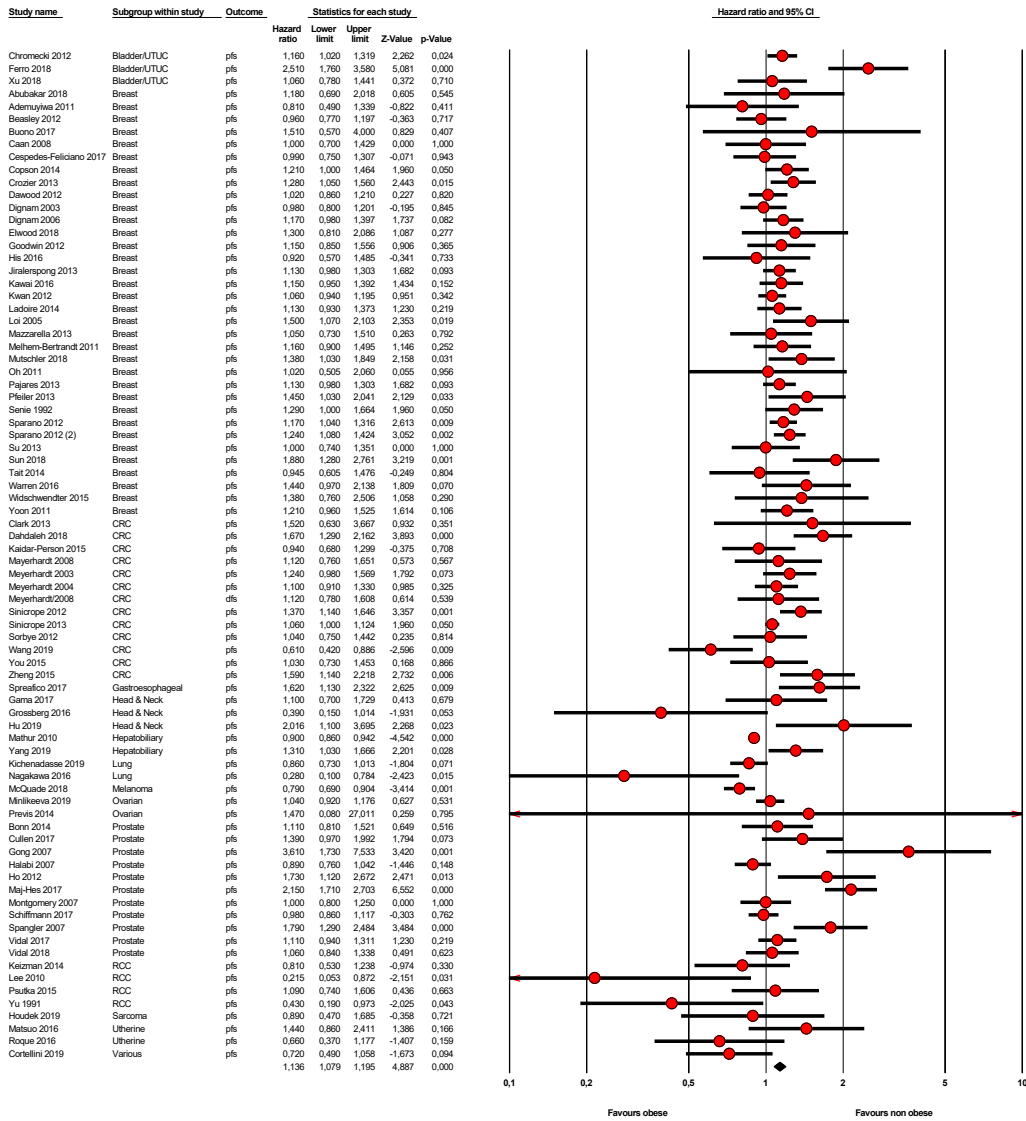

**eFigure 4.** Funnel Plot for Overall Survival Analysis

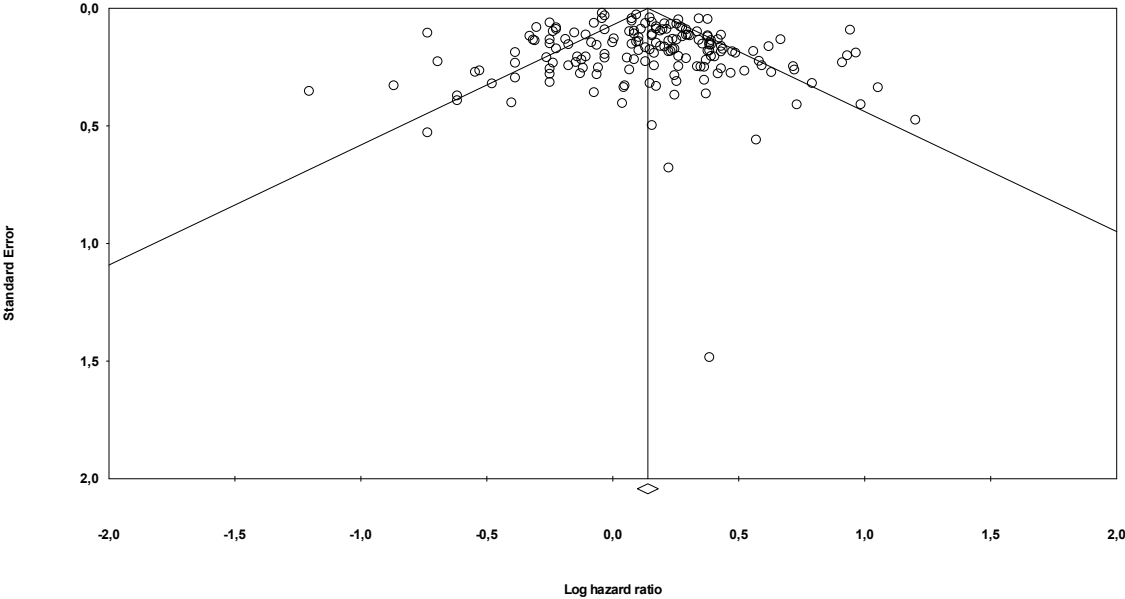

Supplement: jamanetwopen-e213520-s001.pdf [file jamanetwopen-e213520-s001.pdf]
